# Supplementary material for: Metabolic Features of Saliva in Breast Cancer Patients
Source: MDPI journal article supplement (doi:10.3390/metabo12020166), 2022-02-10
Supplement: s1 [file s1]

**Table S1.** Biochemical composition of saliva in breast cancer patients and healthy controls (full list).

| Indicator                    | Breast Cancer, n=487   | Control Group, n=298   | p-value |
|------------------------------|------------------------|------------------------|---------|
| pH                           | 6.48 [6.24; 6.72]      | 6.49 [6.30; 6.72]      | 0.8763  |
| Calcium, mmol/L              | 1.24 [0.87; 1.63]      | 1.27 [1.03; 1.55]      | 0.3566  |
| Phosphorus, mmol/L           | 4.55 [3.47; 5.95]      | 4.36 [3.31; 5.85]      | 0.2804  |
| Sodium, mmol/L               | 8.0 [4.9; 12.8]        | 8.4 [5.6; 12.1]        | 0.1875  |
| Potassium, mmol/L            | 11.2 [8.0; 14.5]       | 10.8 [8.8; 14.2]       | 0.9744  |
| Chlorides, mmol/L            | 25.7 [20.0; 32.3]      | 25.5 [20.7; 31.4]      | 0.4969  |
| Magnesium, mmol/L            | 0.301 [0.235; 0.379]   | 0.296 [0.241; 0.356]   | 0.4505  |
| Protein, mg/mL               | 0.64 [0.37; 1.09]      | 1.08 [0.65; 1.70]      | 0.0000  |
| Urea, mmol/L                 | 9.63 [6.25; 13.38]     | 6.66 [4.36; 9.13]      | 0.0000  |
| Uric acid, $\mu$ mol/L       | 65.4 [24.1; 136.1]     | 85.9 [34.4; 144.5]     | 0.0119  |
| Albumin, mg/mL               | 0.305 [0.182; 0.551]   | 0.264 [0.175; 0.442]   | 0.0564  |
| ALT, U/L                     | 3.92 [2.77; 5.15]      | 3.85 [2.85; 5.08]      | 0.6724  |
| AST, U/L                     | 6.00 [4.17; 8.17]      | 5.58 [3.67; 7.50]      | 0.1117  |
| AST/ALT-ratio, c.u.          | 1.48 [1.15; 1.92]      | 1.40 [1.13; 1.88]      | 0.2170  |
| $\alpha$ -Aminoacids, mmol/L | 4.23 [3.89; 4.76]      | 4.06 [3.83; 4.32]      | 0.0000  |
| Imidazole compounds, mmol/L  | 0.281 [0.182; 0.402]   | 0.303 [0.205; 0.410]   | 0.0750  |
| NO, $\mu$ mol/L              | 29.1 [17.4; 44.6]      | 22.8 [13.2; 36.8]      | 0.0001  |
| ALP, U/L                     | 72.8 [47.8; 106.5]     | 60.8 [41.3; 84.7]      | 0.0002  |
| MM 254, c.u.                 | 0.247 [0.164; 0.380]   | 0.274 [0.179; 0.383]   | 0.1521  |
| MM 280, c.u.                 | 0.198 [0.140; 0.326]   | 0.224 [0.147; 0.324]   | 0.2038  |
| LDH, U/L                     | 1451.0 [861.6; 2093.0] | 1101.5 [635.7; 1908.0] | 0.0002  |
| Catalase, nkat/mL            | 3.78 [2.53; 5.99]      | 4.58 [3.32; 5.79]      | 0.0052  |
| Sialic acids, mmol/L         | 0.201 [0.140; 0.275]   | 0.183 [0.128; 0.293]   | 0.5455  |
| Pyruvic acid, $\mu$ mol/L    | 14.46 [10.05; 19.61]   | 12.99 [9.56; 18.14]    | 0.0551  |
| Diene conjugates, c.u.       | 3.93 [3.72; 4.13]      | 3.92 [3.78; 4.07]      | 0.9332  |
| Triene conjugates, c.u.      | 0.897 [0.789; 1.020]   | 0.893 [0.818; 0.994]   | 0.9102  |
| Schiff bases, c.u.           | 0.541 [0.484; 0.673]   | 0.545 [0.510; 0.576]   | 0.7607  |
| MDA, $\mu$ mol/L             | 7.09 [5.81; 8.97]      | 6.50 [5.73; 7.95]      | 0.0006  |
| GGT, U/L                     | 23.2 [20.0; 26.5]      | 20.4 [17.4; 24.4]      | 0.0000  |
| Seromucoids, c.u.            | 0.097 [0.062; 0.155]   | 0.091 [0.061; 0.130]   | 0.0793  |
| Superoxide dismutase, c.u.   | 73.7 [34.2; 142.1]     | 57.9 [31.6; 113.2]     | 0.0247  |
| $\alpha$ -Amylase, U/L       | 306.5 [122.6; 605.3]   | 185.2 [83.5; 384.4]    | 0.0002  |
| Antioxidant activity, mmol/L | 2.32 [1.43; 3.35]      | 2.32 [1.41; 3.62]      | 0.3426  |
| Lactic acid, mmol/L          | 1.67 [1.41; 2.09]      | 1.78 [1.48; 2.28]      | 0.1899  |
| Peroxidase, c.u.             | 0.440 [0.250; 0.880]   | 0.400 [0.170; 0.750]   | 0.3085  |
| Na/K-ratio, c.u.             | 0.686 [0.481; 1.067]   | 0.751 [0.505; 1.190]   | 0.1270  |
| Ca/P-ratio, c.u.             | 0.268 [0.192; 0.371]   | 0.278 [0.214; 0.381]   | 0.0748  |
| SOD/Catalase-ratio, c.u.     | 19.8 [8.4; 39.7]       | 14.5 [6.6; 37.7]       | 0.0168  |
| SB/(DC+TC)-ratio, c.u.       | 0.111 [0.101; 0.134]   | 0.112 [0.108; 0.118]   | 0.5248  |
| SB/TC-ratio, c.u.            | 0.627 [0.561; 0.704]   | 0.609 [0.567; 0.667]   | 0.0503  |

**Table S2.** Comparison of saliva composition depending on breast cancer stage and healthy control (Kruskal-Wallis criterion) .

| Indicator                    | Group I, n=226          | Group II, n=131         | Group III, n=75         | Group IV, n=55          | Kruskal-Wallis test (H, p) |
|------------------------------|-------------------------|-------------------------|-------------------------|-------------------------|----------------------------|
| pH                           | 6.50<br>[6.24; 6.75]    | 6.45<br>[6.28; 6.63]    | 6.43<br>[6.17; 6.73]    | 6.61<br>[6.27; 6.87]    | 7.028; 0.1344              |
| Calcium, mmol/L              | 1.23<br>[0.84; 1.63]    | 1.25<br>[0.90; 1.69]    | 1.21<br>[1.02; 1.57]    | 1.26<br>[0.69; 1.52]    | 1.131; 0.8893              |
| Phosphorus, mmol/L           | 4.64<br>[3.54; 5.99]    | 4.44<br>[3.42; 5.87]    | 4.39<br>[2.63; 5.44]    | 4.79<br>[3.62; 6.28]    | 6.583; 0.1597              |
| Sodium, mmol/L               | 8.0<br>[4.9; 12.9]      | 8.2<br>[4.5; 13.2]      | 7.1<br>[5.2; 11.1]      | 8.2<br>[6.1; 12.0]      | 2.175; 0.7035              |
| Potassium, mmol/L            | 11.8<br>[8.9; 14.2]     | 10.3<br>[7.2; 14.6]     | 10.7<br>[7.3; 14.1]     | 12.0<br>[9.0; 14.7]     | 3.747; 0.4413              |
| Chlorides, mmol/L            | 25.5<br>[20.0; 31.6]    | 25.7<br>[20.3; 31.6]    | 28.0<br>[20.4; 32.8]    | 25.9<br>[18.8; 35.6]    | 1.481; 0.8301              |
| Magnesium, mmol/L            | 0.282<br>[0.219; 0.380] | 0.296<br>[0.230; 0.369] | 0.318<br>[0.242; 0.377] | 0.345<br>[0.254; 0.395] | 6.849; 0.1441              |
| Protein, mg/mL               | 0.68<br>[0.39; 1.08]    | 0.56<br>[0.37; 1.07]    | 0.58<br>[0.29; 1.14]    | 0.84<br>[0.46; 1.16]    | 71.46; 0.0000              |
| Urea, mmol/L                 | 10.08<br>[6.66; 14.12]  | 9.18<br>[5.90; 13.10]   | 9.17<br>[6.00; 12.08]   | 8.37<br>[5.83; 12.30]   | 71.86; 0.0000              |
| Uric acid, $\mu$ mol/L       | 59.6<br>[23.2; 128.4]   | 58.3<br>[26.3; 126.1]   | 75.6<br>[16.7; 137.6]   | 103.8<br>[39.5; 141.3]  | 10.87; 0.0280              |
| Albumin, mg/mL               | 0.315<br>[0.179; 0.608] | 0.296<br>[0.184; 0.498] | 0.274<br>[0.149; 0.457] | 0.335<br>[0.204; 0.507] | 7.265; 0.1225              |
| ALT, U/L                     | 4.00<br>[2.77; 5.23]    | 4.00<br>[2.69; 5.23]    | 3.92<br>[2.85; 4.92]    | 3.54<br>[2.46; 4.88]    | 2.523; 0.6406              |
| AST, U/L                     | 6.00<br>[4.08; 8.25]    | 6.13<br>[4.33; 8.50]    | 5.71<br>[4.08; 7.75]    | 5.71<br>[3.92; 7.75]    | 4.314; 0.3651              |
| AST/ALT-ratio, c.u.          | 1.44<br>[1.13; 1.94]    | 1.47<br>[1.15; 1.90]    | 1.52<br>[1.18; 1.92]    | 1.54<br>[1.16; 1.97]    | 1.904; 0.7534              |
| $\alpha$ -Aminoacids, mmol/L | 4.29<br>[3.90; 4.89]    | 4.23<br>[3.91; 4.67]    | 4.14<br>[3.86; 4.72]    | 4.24<br>[3.84; 4.65]    | 25.64; 0.0000              |
| Imidazole compounds, mmol/L  | 0.281<br>[0.182; 0.395] | 0.288<br>[0.190; 0.417] | 0.303<br>[0.182; 0.417] | 0.258<br>[0.167; 0.387] | 5.193; 0.2681              |
| NO, $\mu$ mol/L              | 29.1<br>[17.2; 47.5]    | 30.4<br>[18.2; 42.5]    | 22.8<br>[13.9; 46.0]    | 32.3<br>[22.1; 44.6]    | 18.41; 0.0010              |
| ALP, U/L                     | 76.1<br>[50.0; 108.7]   | 68.4<br>[47.8; 104.3]   | 71.7<br>[41.3; 102.1]   | 82.6<br>[47.8; 123.9]   | 16.35; 0.0026              |
| MM 254, c.u.                 | 0.257<br>[0.168; 0.389] | 0.245<br>[0.151; 0.382] | 0.191<br>[0.144; 0.356] | 0.247<br>[0.160; 0.383] | 5.543; 0.2360              |
| MM 280, c.u.                 | 0.216<br>[0.146; 0.331] | 0.205<br>[0.126; 0.329] | 0.175<br>[0.126; 0.289] | 0.201<br>[0.142; 0.333] | 5.294; 0.2585              |
| LDH, U/L                     | 1509.0                  | 1452.5                  | 1280.0                  | 1703.0                  | 16.79; 0.0021              |

|                                 | [829.5; 2088.0]         | [899.1; 2070.0]         | [636.8; 2034.0]         | [972.0; 2279.0]         |               |
|---------------------------------|-------------------------|-------------------------|-------------------------|-------------------------|---------------|
| Catalase, nkat/mL               | 3.86<br>[2.65; 6.25]    | 3.70<br>[2.36; 5.22]    | 3.84<br>[2.25; 6.11]    | 3.52<br>[2.56; 5.51]    | 404.7; 0.0000 |
| Sialic acids,<br>mmol/L         | 0.189<br>[0.140; 0.262] | 0.217<br>[0.146; 0.299] | 0.207<br>[0.128; 0.299] | 0.183<br>[0.110; 0.250] | 4.888; 0.2990 |
| Pyruvic acid,<br>μmol/L         | 14.95<br>[10.29; 20.10] | 14.22<br>[10.29; 19.12] | 12.99<br>[7.84; 18.38]  | 13.60<br>[10.66; 19.36] | 6.106; 0.1913 |
| Diene conjugates,<br>c.u.       | 3.94<br>[3.73; 4.18]    | 3.89<br>[3.70; 4.10]    | 3.89<br>[3.69; 4.06]    | 3.97<br>[3.79; 4.16]    | 3.659; 0.4541 |
| Triene conjugates,<br>c.u.      | 0.896<br>[0.795; 1.017] | 0.864<br>[0.785; 0.995] | 0.899<br>[0.794; 1.029] | 0.913<br>[0.786; 1.054] | 2.475; 0.6491 |
| Schiff bases, c.u.              | 0.546<br>[0.479; 0.671] | 0.529<br>[0.483; 0.667] | 0.536<br>[0.477; 0.625] | 0.565<br>[0.502; 0.769] | 4.587; 0.3323 |
| MDA, μmol/L                     | 6.92<br>[5.73; 8.89]    | 7.09<br>[5.90; 9.15]    | 7.18<br>[5.94; 9.23]    | 7.26<br>[5.81; 8.89]    | 13.56; 0.0089 |
| GGT, U/L                        | 23.1<br>[19.8; 26.1]    | 24.0<br>[20.4; 27.4]    | 22.7<br>[19.9; 26.6]    | 22.2<br>[19.4; 26.1]    | 37.86; 0.0000 |
| Seromucoids, c.u.               | 0.099<br>[0.062; 0.163] | 0.104<br>[0.068; 0.165] | 0.080<br>[0.055; 0.135] | 0.098<br>[0.055; 0.138] | 8.257; 0.0826 |
| Superoxide<br>dismutase, c.u.   | 76.3<br>[34.2; 168.4]   | 57.9<br>[28.9; 113.2]   | 75.0<br>[36.8; 134.2]   | 73.7<br>[39.5; 113.2]   | 10.31; 0.0355 |
| α-Amylase, U/L                  | 319.0<br>[157.7; 596.8] | 262.2<br>[124.8; 664.9] | 341.5<br>[111.6; 940.6] | 347.8<br>[115.4; 482.9] | 14.84; 0.0050 |
| Antioxidant<br>activity, mmol/L | 2.31<br>[1.50; 3.38]    | 2.42<br>[1.59; 3.44]    | 2.35<br>[1.43; 3.09]    | 1.92<br>[1.21; 3.63]    | 1.899; 0.7542 |
| Lactic acid,<br>mmol/L          | 1.67<br>[1.42; 2.10]    | 1.60<br>[1.34; 2.10]    | 1.69<br>[1.42; 1.98]    | 1.68<br>[1.49; 2.10]    | 1.865; 0.7606 |
| Peroxidase, c.u.                | 0.455<br>[0.250; 0.925] | 0.440<br>[0.250; 0.750] | 0.380<br>[0.170; 0.760] | 0.560<br>[0.300; 0.790] | 3.024; 0.5539 |
| Na/K-ratio, c.u.                | 0.698<br>[0.461; 1.036] | 0.649<br>[0.494; 1.016] | 0.700<br>[0.487; 1.217] | 0.747<br>[0.473; 1.090] | 2.653; 0.6174 |
| Ca/P-ratio, c.u.                | 0.256<br>[0.185; 0.354] | 0.274<br>[0.196; 0.380] | 0.274<br>[0.221; 0.450] | 0.266<br>[0.185; 0.345] | 10.40; 0.0343 |
| SOD/Catalase-<br>ratio, c.u.    | 22.1<br>[8.2; 41.7]     | 17.9<br>[6.7; 31.0]     | 18.0<br>[9.1; 50.0]     | 19.5<br>[10.2; 39.5]    | 7.890; 0.0957 |
| SB/(DC+TC)-<br>ratio, c.u.      | 0.111<br>[0.100; 0.133] | 0.110<br>[0.101; 0.131] | 0.111<br>[0.102; 0.125] | 0.114<br>[0.107; 0.151] | 4.182; 0.3819 |
| SB/TC-ratio, c.u.               | 0.628<br>[0.557; 0.698] | 0.627<br>[0.566; 0.696] | 0.601<br>[0.556; 0.683] | 0.647<br>[0.569; 0.765] | 9.531; 0.0491 |

**Table S3.** Comparison of the saliva composition of patients with ductal and lobular breast cancer and healthy controls (Kruskal-Wallis criterion) .

| Indicator                    | Lobular BC, n=86       | Ductal BC, n=227        | Kruskal-Wallis test (H, p) |
|------------------------------|------------------------|-------------------------|----------------------------|
| pH                           | 6.51 [6.19; 6.76]      | 6.50 [6.29; 6.76]       | 0.7412; 0.6903             |
| Calcium, mmol/L              | 1.20 [0.93; 1.64]      | 1.25 [0.83; 1.59]       | 0.8670; 0.6482             |
| Phosphorus, mmol/L           | 4.58 [3.47; 5.74]      | 4.51 [3.46; 6.03]       | 0.9079; 0.6351             |
| Sodium, mmol/L               | 6.5 [4.1; 11.8]        | 7.7 [4.7; 12.5]         | 5.183; 0.0749              |
| Potassium, mmol/L            | 9.9 [6.5; 13.1]        | 10.9 [8.0; 14.2]        | 3.736; 0.1545              |
| Chlorides, mmol/L            | 25.6 [18.8; 32.2]      | 25.1 [19.2; 32.6]       | 0.2796; 0.8695             |
| Magnesium, mmol/L            | 0.295 [0.236; 0.371]   | 0.292 [0.235; 0.366]    | 0.4977; 0.7797             |
| Protein, mg/mL               | 0.63 [0.36; 1.02]      | 0.69 [0.40; 1.15]       | 49.97; 0.0000              |
| Urea, mmol/L                 | 9.86 [4.86; 14.33]     | 9.43 [6.03; 12.83]      | 41.49; 0.0000              |
| Uric acid, $\mu$ mol/L       | 56.73 [27.03; 126.92]  | 70.27 [25.00; 140.48]   | 4.922; 0.0853              |
| Albumin, mg/mL               | 0.296 [0.187; 0.419]   | 0.313 [0.177; 0.590]    | 3.865; 0.1448              |
| ALT, U/L                     | 3.65 [2.50; 5.12]      | 3.77 [2.69; 5.15]       | 0.6820; 0.7111             |
| AST, U/L                     | 4.83 [3.27; 7.67]      | 5.96 [4.25; 8.08]       | 3.881; 0.1432              |
| AST/ALT-ratio, c.u.          | 1.37 [1.13; 1.90]      | 1.53 [1.15; 1.94]       | 1.944; 0.3782              |
| $\alpha$ -Aminoacids, mmol/L | 4.16 [3.89; 4.79]      | 4.29 [3.88; 4.89]       | 20.75; 0.0000              |
| Imidazole compounds, mmol/L  | 0.266 [0.190; 0.379]   | 0.273 [0.175; 0.395]    | 4.668; 0.0969              |
| NO, $\mu$ mol/L              | 25.4 [15.6; 44.6]      | 26.8 [18.2; 40.7]       | 8.614; 0.0135              |
| ALP, U/L                     | 69.54 [39.11; 97.79]   | 73.88 [47.81; 108.65]   | 12.47; 0.0020              |
| MM 254, c.u.                 | 0.206 [0.136; 0.332]   | 0.256 [0.168; 0.382]    | 8.728; 0.0127              |
| MM 280, c.u.                 | 0.177 [0.118; 0.291]   | 0.200 [0.144; 0.342]    | 7.210; 0.0272              |
| LDH, U/L                     | 1374.0 [731.8; 2008.0] | 1532.0 [1022.0; 2217.0] | 20.12; 0.0000              |
| Catalase, nkat/mL            | 3.26 [2.45; 5.49]      | 3.88 [2.52; 6.25]       | 7.107; 0.0286              |
| Sialic acids, mmol/L         | 0.192 [0.140; 0.275]   | 0.189 [0.134; 0.269]    | 0.0608; 0.9701             |
| Pyruvic acid, $\mu$ mol/L    | 12.62 [8.58; 18.63]    | 14.46 [10.05; 20.10]    | 4.965; 0.0835              |
| Diene conjugates, c.u.       | 3.91 [3.66; 4.08]      | 3.93 [3.74; 4.18]       | 1.876; 0.3914              |
| Triene conjugates, c.u.      | 0.930 [0.822; 1.103]   | 0.904 [0.800; 1.031]    | 3.821; 0.1480              |
| Schiff bases, c.u.           | 0.576 [0.490; 0.755]   | 0.555 [0.494; 0.686]    | 6.924; 0.0314              |
| MDA, $\mu$ mol/L             | 6.92 [5.47; 8.29]      | 7.14 [5.90; 9.15]       | 10.13; 0.0063              |
| GGT, U/L                     | 21.9 [18.3; 24.9]      | 23.4 [19.8; 26.5]       | 27.94; 0.0000              |
| Seromucoids, c.u.            | 0.093 [0.055; 0.147]   | 0.099 [0.063; 0.162]    | 4.321; 0.1153              |
| Superoxide dismutase, c.u.   | 84.2 [31.6; 152.6]     | 68.4 [39.5; 144.7]      | 6.430; 0.0402              |
| $\alpha$ -Amylase, U/L       | 217.4 [113.4; 451.5]   | 304.7 [116.0; 526.4]    | 7.360; 0.0252              |
| Antioxidant activity, mmol/L | 2.46 [1.29; 3.52]      | 2.23 [1.19; 3.18]       | 3.603; 0.1651              |
| Lactic acid, mmol/L          | 1.69 [1.34; 1.96]      | 1.68 [1.41; 2.14]       | 1.768; 0.4130              |
| Peroxidase, c.u.             | 0.320 [0.210; 0.750]   | 0.555 [0.290; 0.865]    | 4.026; 0.1336              |

|                             |                      |                      |               |
|-----------------------------|----------------------|----------------------|---------------|
| Na/K-ratio, c.u.            | 0.65 [0.46; 1.14]    | 0.67 [0.49; 1.03]    | 2.842; 0.2414 |
| Ca/P-ratio, c.u.            | 0.27 [0.20; 0.36]    | 0.27 [0.19; 0.37]    | 2.023; 0.3636 |
| SOD/Catalase-ratio,<br>c.u. | 21.5 [9.9; 41.7]     | 19.9 [8.2; 42.8]     | 6.739; 0.0344 |
| SB/(DC+TC)-ratio, c.u.      | 0.115 [0.107; 0.153] | 0.112 [0.103; 0.137] | 4.345; 0.1139 |
| SB/TC-ratio, c.u.           | 0.644 [0.579; 0.707] | 0.631 [0.569; 0.723] | 10.32; 0.0057 |
